# Supplementary material for: New Andean source of resistance to anthracnose and angular leaf spot: Fine-mapping of disease-resistance genes in California Dark Red Kidney common bean cultivar
Source: PLoS One. 2020 Jun 29;15(6):e0235215. doi: 10.1371/journal.pone.0235215 (PMC7323968; doi:10.1371/journal.pone.0235215)
Supplement: S4 Table — (DOC) [file pone.0235215.s005.doc]

**Table S4.** Allelism tests in F2 populations for the anthracnose resistance gene in the common bean cultivar California Dark Red Kidney (CDRK).

| Crosses | Resistance Gene | Race | Linkage Group | Observed Ratio | | Expected Ratio (R:S) | 2 | *P-value* |
| --- | --- | --- | --- | --- | --- | --- | --- | --- |
| Rc | Sd |
| CDRK × MDRKa | *Co-1* | 3481 | Pv01 | 280 | 18 | 15:1 | 0.022 | 0.88 |
| CDRK × ACb | *Co-AC* | 3481 | Pv01 | 113 | 8 | 15:1 | 0.026 | 0.87 |

MDRKa = Michigan Dark Red Kidney; ACb = Amendoim Cavalo; Rc = Resistant; Sd = Susceptible
